# Supplementary material for: Ni–Cu–Mn based hybrid supercapacitor with high flexibility and strength for wearable electronics
Source: Royal Society of Chemistry journal article supplement (doi:10.1039/d5ma01187f), 2025-12-10
Supplement: d5ma01187f3.pdf [file d5ma01187f3.pdf]

## Ni-Cu-Mn Based Hybrid Supercapacitor with High Flexibility and Strength for Wearable Electronics

Arunesh Kumar<sup>a</sup>, Arpit Thomas<sup>b</sup>, Michael Lastovich<sup>c</sup>, Bharat Gwalani<sup>c</sup>, Harpreet Singh Arora<sup>a, #</sup>

<sup>a</sup> Department of Mechanical Engineering, Shiv Nadar Institution of Eminence, Deemed to be University, India (UP)- 201310

<sup>b</sup> Centre for Inter-Disciplinary Research and Innovation, University of Petroleum and Energy Studies, Bidholi Via-Prem Nagar, Dehradun-248007

<sup>c</sup> Department of Materials Science and Engineering, North Carolina State University, Raleigh, North Carolina 27695, United States

<sup>#</sup>Corresponding author's E-mail: [harpreet.arora@snu.edu.in](mailto:harpreet.arora@snu.edu.in)

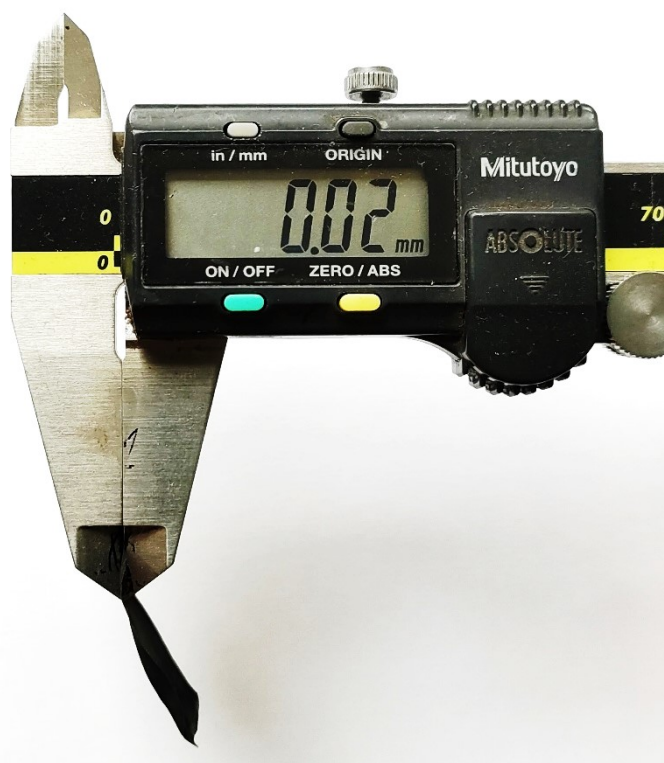

Fig. S1: Digital photograph showing thickness of flexible SM substrate.

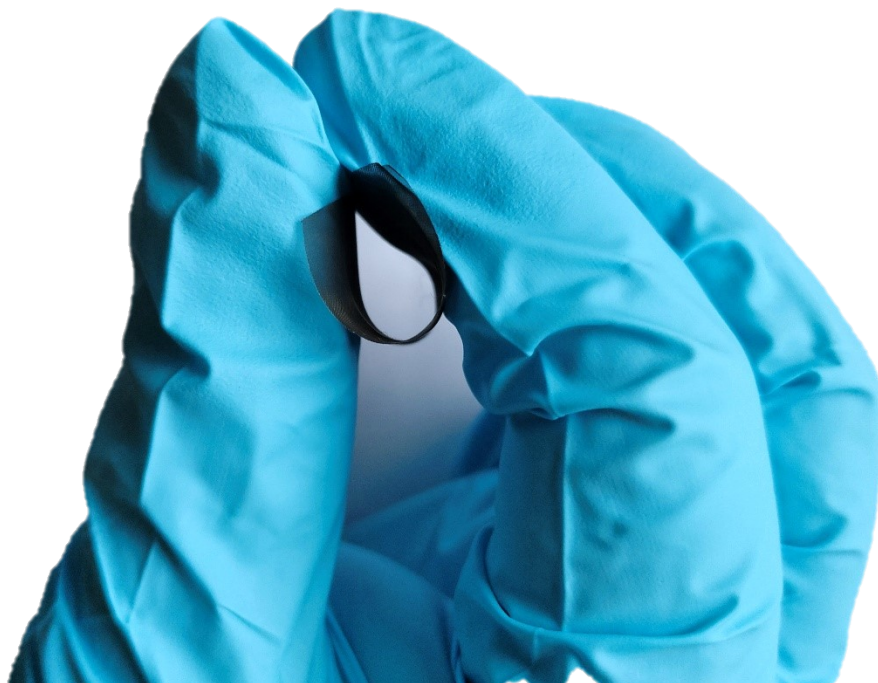

Fig. S2: Digital photograph showing flexibility of the electrode.

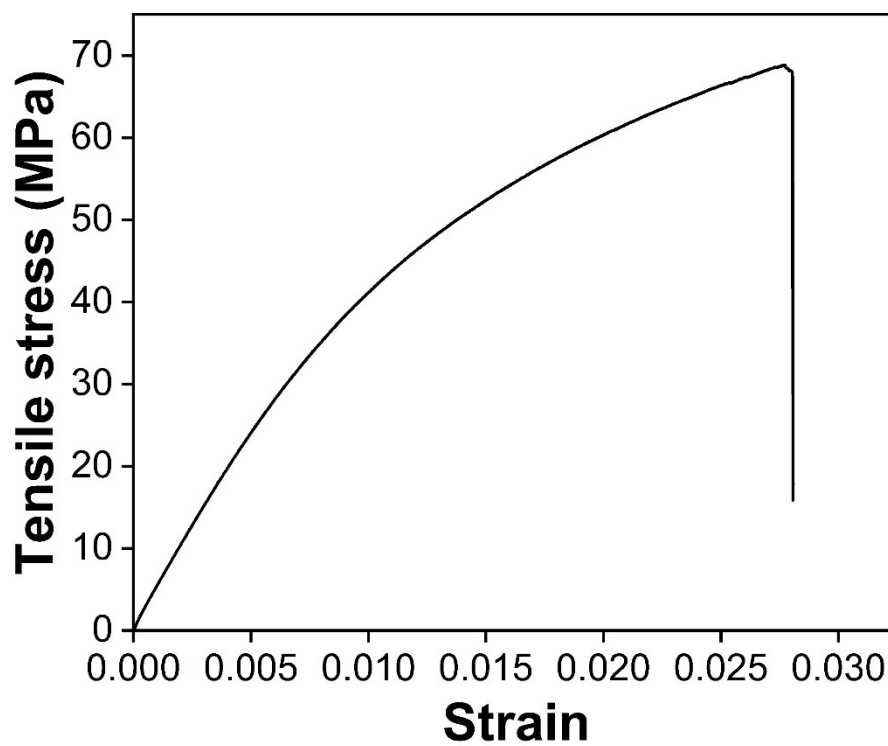

Fig. S3: Stress vs strain curve for the electrode.

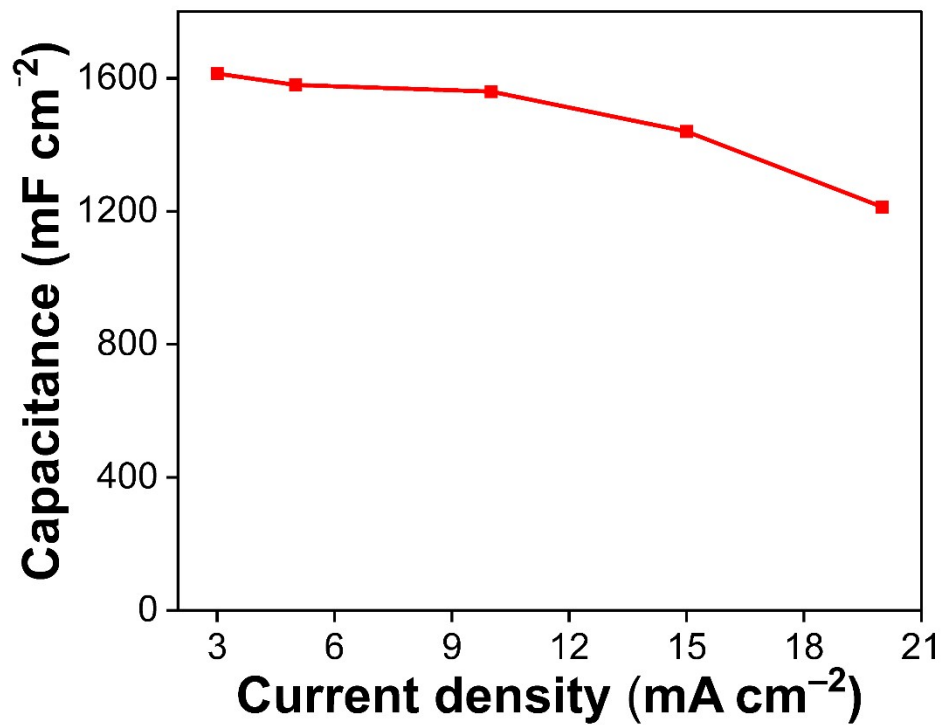

Fig. S4: Areal capacitance of the electrode at different current densities.

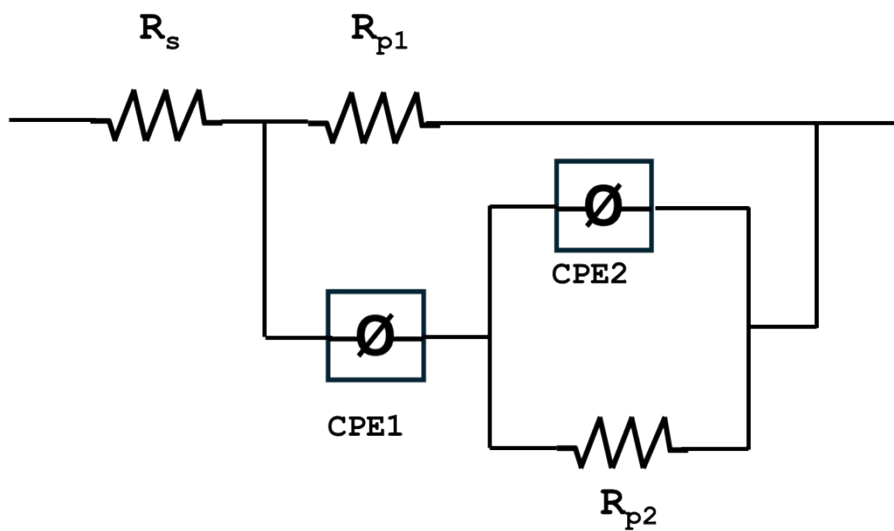

Fig. S5: Equivalent electrical circuit for modelling of impedance spectra.

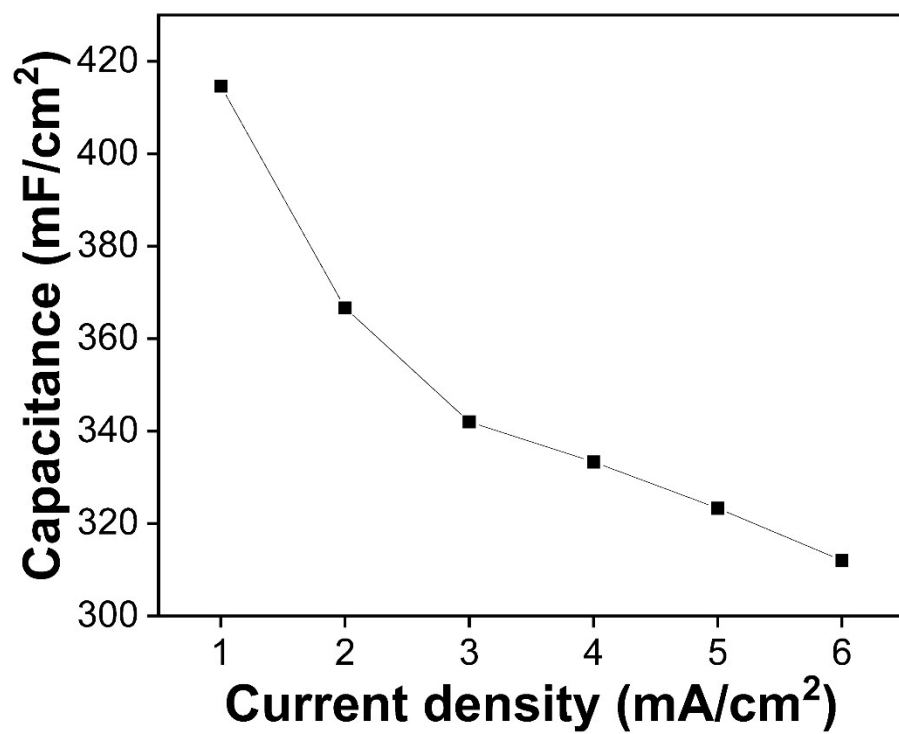

Fig. S6: Areal capacitance of the FHS device at different current densities.

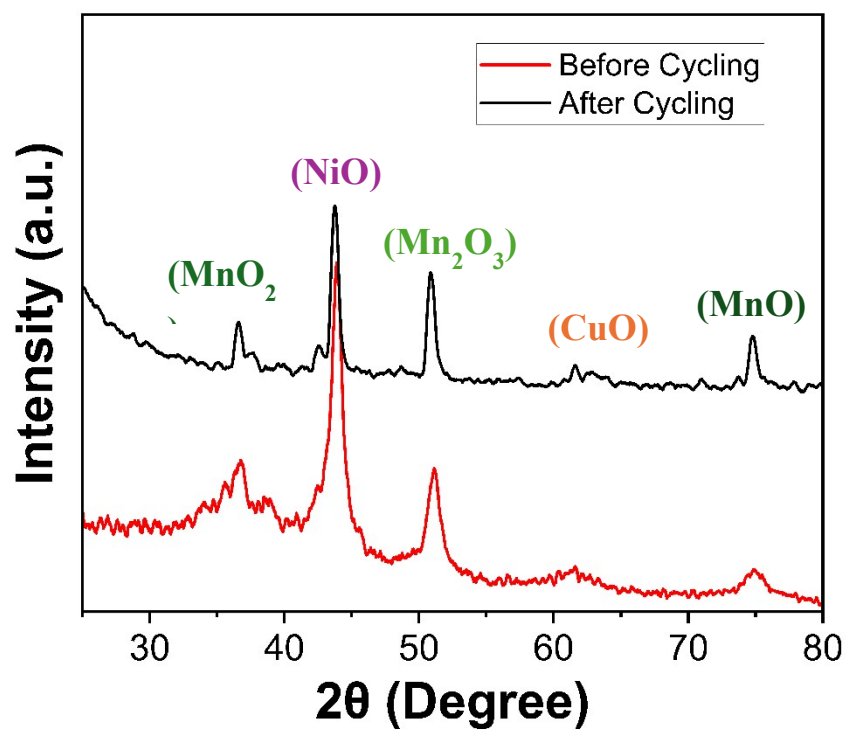

Fig. S7: XRD spectra of the electrode before and after 10,000 cycles.

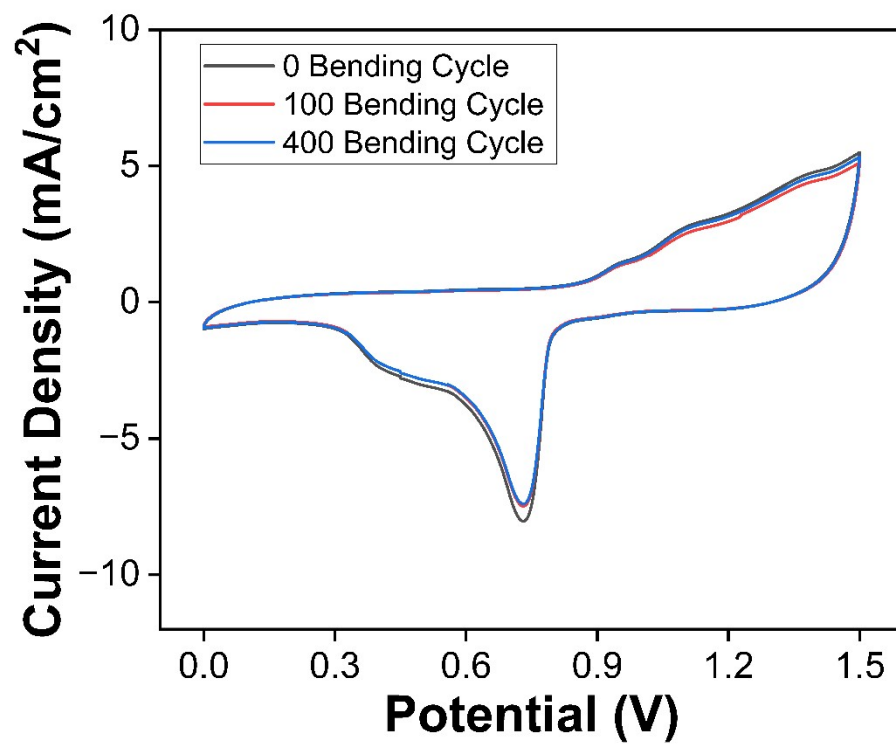

Fig. S8: CV curves of the device after multiple bending cycles at 135°.
